# Supplementary material for: The Impact of Cancer-Related Fatigue on HRQOL in Survivors of Childhood Cancer: A DCCSS LATER Study
Source: Cancers (Basel). 2022 Jun 9;14(12):2851. doi: 10.3390/cancers14122851 (PMC9221067; doi:10.3390/cancers14122851)
Supplement: Supplementary file 1 [file cancers-14-02851-s001.zip › cancers-1731940-supplementary.pdf]

**Supplementary Table S1. Health-related quality of life concepts measured by the SF-36 and TAAQOL.**

| <b>Dimension</b>             | <b>Abbreviation</b> | <b>Definition</b>                                                                     | <b>Number of items</b> |
|------------------------------|---------------------|---------------------------------------------------------------------------------------|------------------------|
| <b>SF-36</b>                 |                     |                                                                                       |                        |
| Physical functioning         | PF                  | Limitations in physical activities because of health problems                         | 10                     |
| Social functioning           | SF                  | Limitations in social activities because of physical or emotional problems            | 2                      |
| Bodily pain                  | BP                  | Experience of physical pain in daily life                                             | 2                      |
| General mental health        | MH                  | Psychological distress and well-being                                                 | 5                      |
| Role limitations (physical)  | RP                  | Limitations in usual role/work-related activities because of physical health problems | 4                      |
| Role limitations (emotional) | RE                  | Limitations in usual role/work-related activities because of emotional problems       | 3                      |
| Vitality                     | VT                  | Feelings of energy and fatigue                                                        | 4                      |
| General health perceptions   | GH                  | Perception of current and future health including resistance to illness               | 5                      |
| <b>TAAQOL</b>                |                     |                                                                                       |                        |
| Sleep                        | SL                  | Problems/limitations concerning sleeping (lying awake, sleeping restlessly)           | 4                      |
| Sexuality                    | SE                  | Problems/limitations concerning sex (frequency, satisfaction)                         | 2                      |
| Cognitive functioning        | CO                  | Problems/limitations concerning cognitive functioning (concentrating, remembering)    | 4                      |

**Supplementary Table S2. Confounder variables included in multivariable analysis and their categories.**

| Variable of interest            | Questionnaire item (when applicable)                                                                                                                                                                                                                                                                                             | Categories                                                                                                                                                                                                                                                                  |
|---------------------------------|----------------------------------------------------------------------------------------------------------------------------------------------------------------------------------------------------------------------------------------------------------------------------------------------------------------------------------|-----------------------------------------------------------------------------------------------------------------------------------------------------------------------------------------------------------------------------------------------------------------------------|
| Age at assessment               | Date of assessment – date of birth                                                                                                                                                                                                                                                                                               | In years continuous                                                                                                                                                                                                                                                         |
| BMI                             | Length (cm) and weight (kg) measured during clinic visit                                                                                                                                                                                                                                                                         | Underweight: BMI <18.5<br>Healthy weight: BMI between 18.5 and 25<br>Overweight: BMI between 25 and 30<br>Obesity: BMI ≥30                                                                                                                                                  |
| Employment status               | Do you currently have work? Yes/no                                                                                                                                                                                                                                                                                               | Employed: Currently employed<br>Unemployed: Currently unemployed                                                                                                                                                                                                            |
| Educational level               | What is the highest level of education you have completed? Answer options: primary education, vocational education, preparatory secondary vocational education, secondary vocational education, school of higher general secondary education, pre-university education, higher vocational education, university, special school. | Low: Primary education, vocational education, special school<br>Middle: Preparatory secondary vocational education, secondary vocational education, school of higher general secondary education, pre-university education<br>High: Higher vocational education, university |
| Sleep quality                   | Seven PSQI component scores and total scores were calculated using scoring instructions described elsewhere [40]                                                                                                                                                                                                                 | Good sleeper: PSQI total score ≤5<br>Poor sleeper: PSQI total score >5                                                                                                                                                                                                      |
| Anxiety                         | The outcomes of the seven items of the HADS anxiety subscale were added up and the total score was used to indicate person's as having anxiety yes/no.                                                                                                                                                                           | No anxiety: HADS anxiety subscale score <8<br>Anxiety: HADS anxiety subscale score ≥8                                                                                                                                                                                       |
| Depression                      | The outcomes of the seven items of the HADS depression subscale were added up and the total score was used to indicate person's as having depression yes/no.                                                                                                                                                                     | No depression: HADS depression subscale score <8<br>Depression: HADS depression subscale score ≥8                                                                                                                                                                           |
| Number of somatic comorbidities | In 2013 a questionnaire about health issues was completed and used to indicate whether a participant suffered one or more health issues as classified by Streefkerk et al. [41]                                                                                                                                                  | 0: Zero comorbidities<br>1-2: One or two comorbidities<br>>2: More than two comorbidities                                                                                                                                                                                   |

*Abbreviations: BMI=Body Mass Index; PSQI=Pittsburg Sleep Quality Index; HADS=Hospital Anxiety and Depression Scale*

**Supplementary Table S3. Overview missing values**

| Variable                        | Number of missing values (%) |
|---------------------------------|------------------------------|
| SF-36                           |                              |
| PF                              | 40 (2.4)                     |
| RP                              | 41 (2.4)                     |
| RE                              | 49 (2.9)                     |
| BP                              | 45 (2.7)                     |
| MH                              | 53 (3.1)                     |
| VT                              | 53 (3.1)                     |
| GH                              | 53 (3.1)                     |
| SF                              | 44 (2.6)                     |
| TAAQOL                          |                              |
| SL                              | 12 (0.7)                     |
| SE                              | 60 (3.5)                     |
| CO                              | 10 (0.6)                     |
| PSQI poor sleeper (yes/no)      | 53 (3.1)                     |
| HADS anxiety (yes/no)           | 79 (4.7)                     |
| HADS depression (yes/no)        | 81 (4.8)                     |
| BMI                             | 48 (2.8)                     |
| Employment status               | 18 (1.1)                     |
| Educational level               | 17 (1.0)                     |
| Number of somatic comorbidities | 328 (19.4)                   |

*Abbreviations: PF=Physical Functioning, RP=Role Physical, RE=Role Emotional, BP=Bodily Pain, MH=Mental Health, VT=Vitality, GH=General Health, SL=Sleep, SE=Sexuality, CO=Cognitive Functioning. The variables sex, age at assessment, primary childhood diagnosis, treatment, and chronic fatigue were not included in the table as no missing values were present.*

**Supplementary Table S4. Comparison participants vs. non-participants.**

| Characteristic                                         | Participants<br>(n=1695)<br>N (%) | Non-participants<br>(n=2296)*<br>N (%) | p-<br>value <sup>e</sup> | ES <sup>f</sup> |
|--------------------------------------------------------|-----------------------------------|----------------------------------------|--------------------------|-----------------|
| <b>Female sex</b>                                      | 817 (48.2)                        | 937 (40.8)                             | <0.001                   | 0.07            |
| <b>Decade of birth</b>                                 |                                   |                                        | 0.230                    | 0.04            |
| <1960                                                  | 20 (1.2)                          | 22 (0.9)                               |                          |                 |
| 1960-1969                                              | 143 (8.4)                         | 160 (7.0)                              |                          |                 |
| 1970-1979                                              | 436 (25.7)                        | 582 (25.3)                             |                          |                 |
| 1980-1989                                              | 654 (38.6)                        | 875 (38.1)                             |                          |                 |
| ≥1990                                                  | 442 (26.1)                        | 658 (28.6)                             |                          |                 |
| <b>Age at diagnosis</b>                                |                                   |                                        | 0.167                    | 0.04            |
| 0-5                                                    | 770 (45.4)                        | 1093 (47.6)                            |                          |                 |
| 5-10                                                   | 458 (27.0)                        | 625 (27.2)                             |                          |                 |
| 10-15                                                  | 370 (21.8)                        | 437 (19.0)                             |                          |                 |
| 15-18                                                  | 97 (5.7)                          | 141 (6.1)                              |                          |                 |
| <b>Primary childhood cancer diagnosis <sup>a</sup></b> |                                   |                                        | 0.526                    | 0.05            |
| Leukemia                                               | 581 (34.3)                        | 781 (34.0)                             |                          |                 |
| Non-Hodgkin lymphoma <sup>b</sup>                      | 210 (12.4)                        | 261 (11.4)                             |                          |                 |
| Hodgkin lymphoma                                       | 121 (7.1)                         | 162 (7.1)                              |                          |                 |
| CNS                                                    | 158 (9.3)                         | 263 (11.5)                             |                          |                 |
| Neuroblastoma                                          | 97 (5.7)                          | 122 (5.3)                              |                          |                 |
| Retinoblastoma                                         | 8 (0.5)                           | 16 (0.7)                               |                          |                 |
| Renal tumors                                           | 193 (11.4)                        | 251 (10.9)                             |                          |                 |
| Hepatic tumors                                         | 17 (1.0)                          | 25 (1.1)                               |                          |                 |
| Bone tumors                                            | 101 (6.0)                         | 120 (5.2)                              |                          |                 |
| Soft tissue tumors                                     | 124 (7.3)                         | 169 (7.4)                              |                          |                 |
| Germ cell tumors                                       | 56 (3.3)                          | 95 (4.1)                               |                          |                 |
| Other and unspecified <sup>c</sup>                     | 29 (1.7)                          | 31 (1.4)                               |                          |                 |
| <b>Childhood cancer treatment <sup>d</sup></b>         |                                   |                                        | <0.001                   | 0.12            |
| Surgery only                                           | 109 (6.4)                         | 266 (11.6)                             |                          |                 |
| Chemotherapy, no radiotherapy                          | 917 (54.1)                        | 1293 (56.3)                            |                          |                 |
| Radiotherapy, no chemotherapy                          | 93 (5.5)                          | 132 (5.7)                              |                          |                 |
| Radiotherapy and chemotherapy                          | 568 (33.5)                        | 575 (25.0)                             |                          |                 |
| No treatment/treatment unknown                         | 8 (0.5)                           | 30 (1.3)                               |                          |                 |
| <b>Recurrence</b>                                      |                                   |                                        | 0.103                    | 0.03            |
| No                                                     | 1468 (86.6)                       | 2028 (88.3)                            |                          |                 |
| Yes                                                    | 227 (13.4)                        | 268 (11.7)                             |                          |                 |

\*Non-participants were invited to participate but did not return or complete the fatigue and HRQOL questionnaires

<sup>a</sup> Diagnostic groups included all malignancies covered by the third edition of the International Classification of Childhood Cancer (ICCC-3) as well as multifocal Langerhans cell histiocytosis.

<sup>b</sup> Includes all morphology codes specified in the ICC-3 under lymphomas and reticuloendothelial neoplasms, except for Hodgkin lymphomas. Also includes multifocal Langerhans cell histiocytosis.

<sup>c</sup> Includes all morphology codes specified in the ICC-3 under other malignant epithelial neoplasms and malignant melanomas and other and unspecified malignant neoplasms.

<sup>d</sup> Treatment data included primary treatment and all recurrences.

<sup>e</sup> Chi-Square test

<sup>f</sup> Effect size, calculated as Cramér's V (<0.1=little, 0.1=low, 0.3=medium, 0.5=high).

#### Complete names of the Dutch LATER Study Group

Birgitta Versluys, Martha Grootenhuis, Flora van Leeuwen, Lideke van der Steeg, Geert Janssens, Hanneke van Santen, Jaap den Hartogh, Lilian Batenburg, Hanneke de Ridder, Nynke Hollema, Lennart Teunissen, Anke Schellekens)
